# Supplementary material for: mTORC2: a multifaceted regulator of autophagy
Source: PubMed Central journal article supplement (PMC9814435; doi:10.1186/s12964-022-00859-7), 2023-01-05
Supplement: 12964_2022_859_MOESM2_ESM.pdf [file 12964_2022_859_MOESM2_ESM.pdf]

Supplementary table 1. Regulation of mTORC2 on autophagy

| Signaling             | Effect on autophagy                                                                                       | Mechanism                                                                                                                                                 | References |
|-----------------------|-----------------------------------------------------------------------------------------------------------|-----------------------------------------------------------------------------------------------------------------------------------------------------------|------------|
|                       | In fasting muscle, overexpression of activated Akt completely abolished the formation of GFP-LC3-positive | In fasting muscle, mTORC2 negatively regulated autophagy by activating AKT which then inhibits FoxO3-Bnip3 pathway                                        | [29]       |
| mTORC2-AKT            | Activation of AKT by mTORC2 decreases the level of CMA                                                    | mTORC2 inhibits CMA by phosphorylating lysosome-associated AKT and that repress the assembly of LAMP-2A                                                   | [29]       |
|                       | Constitutive activation of FoxO3 leads to mitochondrial degeneration and autophagy                        | mTORC2 maintains normal level of autophagy by activating AKT and in turn inhibits the activity of FoxO3                                                   | [49]       |
|                       | Lacking SGK-1 resulted in mitochondrial permeability increased; autophagy increased; lifespan decrease    | mTORC2 maintains low mitochondrial permeability by phosphorylating SGK-1                                                                                  | [6]        |
| mTORC2/TOR2-SGK1/Ypk1 | The autophagic activity of SGK1 knockout mice increased significantly                                     | mTORC2 inhibits autophagy by activating SGK1 and this process may repress the expression of ULK1                                                          | [45]       |
|                       | The autophagic activity increased in mTORC2/SGK-1-deficient animals                                       | mTORC2 contributes to mitochondrial homeostasis and prevents mtROS induced autophagy by activating SGK1                                                   | [52]       |
|                       | Under amino acid starvation, TORC2 is a positive regulator of autophagy                                   | TORC2 inhibits the Ca <sup>2+</sup> and Cmd1-dependent phosphatase, calcineurin through Ypk1, to enable the activation of the Gen2, and promote autophagy | [56]       |
| mTORC2-PKC            | IGF-1R depletion inhibits autophagy                                                                       | In IGF-1R depleted cells, the activation of mTORC2 is inhibited which decreased the activity of PKC, and then damaged autophagosome precursor formation.  | [40]       |

Blocking PKC can inhibit autophagy

mTORC2-PKC $\alpha$  contributes to kidney fibrosis by increasing autophagic flux

[71]

---
